# Supplementary material
Source: publisher figshare collection journal article supplement (https://frontiersin.figshare.com/ndownloader/files/28168041)
Supplement: Supplementary file [file 28168041]

## Supplementary Figure 1

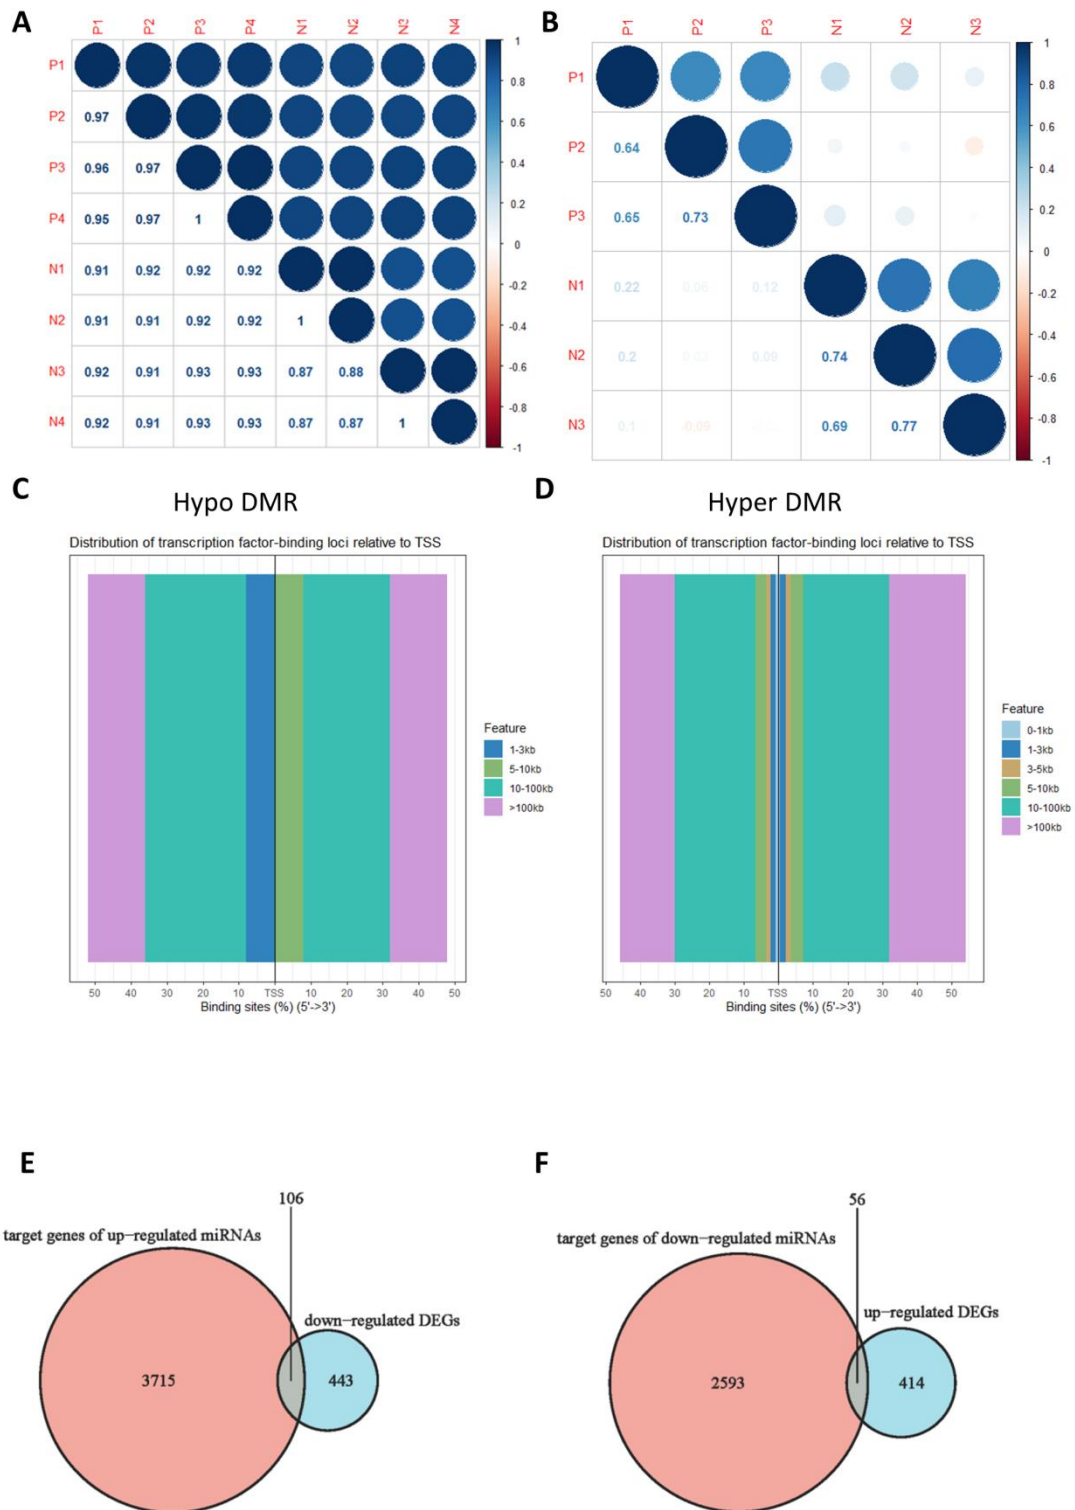

Supplementary Figure 1

(A, B) Correlation analysis of transcriptome and DNA methylation samples, respectively. (C, D) The distance from transcription initiation site of hypo DMRs and hyper DMRs, respectively. (E, F)

Venn diagram showing the overlap of target genes of the differentially expressed miRNAs and differentially expressed genes, respectively.
